# Supplementary material
Source: PubMed Central journal article supplement (PMC5035372)
Supplement: Supp_Table1.pdf [file Supp_Table1.pdf]

Supplemental Table 1. Purity and integrity values for extracted RNA.

| <b>EXPOSURE GROUP</b> | <b>SAMPLE ID</b> | <b>260/280</b> | <b>RIN</b> |
|-----------------------|------------------|----------------|------------|
| TCDD_1                | B2-CM7           | 2.03           | 7.9        |
| TCDD_2                | B2-CM9           | 1.94           | 6.9        |
| TCDD_3                | B3-CM1           | 2.05           | 6.3        |
| TCDD_4                | B3-CM2           | 1.99           | 6.7        |
| TCDD_5                | B3-CM3           | 2.01           | 8.1        |
| DMSO_1                | B2-DM1           | 1.99           | 5.8        |
| DMSO_2                | B2-DM2           | 2.08           | 6.6        |
| DMSO_3                | B3-DM1           | 1.98           | 8          |
| DMSO_4                | B3-DM2           | 2.05           | 7.5        |
| DMSO_5                | B3-DM3           | 2.06           | 6.4        |
