# Supplementary material
Source: PubMed Central journal article supplement (PMC5035372)
Supplement: Supp_Table3.pdf [file Supp_Table3.pdf]

**Supplemental Table 3.** MIQE checklist for authors, reviewers and editors. All essential information (E) must be submitted with the manuscript. Desirable information (D) should be submitted if available.

| ITEM TO CHECK                                             | IMPORTANCE | COMMENTS                                                                                                                                                                                                                           |
|-----------------------------------------------------------|------------|------------------------------------------------------------------------------------------------------------------------------------------------------------------------------------------------------------------------------------|
| <b>EXPERIMENTAL DESIGN</b>                                |            |                                                                                                                                                                                                                                    |
| Definition of experimental and control groups             | E          | TCDD-exposed and vehicle (DMSO)                                                                                                                                                                                                    |
| Number within each group                                  | E          | 5                                                                                                                                                                                                                                  |
| Assay carried out by core lab or investigator's lab?      | D          | Investigator's lab                                                                                                                                                                                                                 |
| Acknowledgement of authors' contributions                 | D          | Yes                                                                                                                                                                                                                                |
| <b>SAMPLE</b>                                             |            |                                                                                                                                                                                                                                    |
| Description                                               | E          | Testis from adult zebrafish exposed to sublethal levels of TCDD                                                                                                                                                                    |
| Volume/mass of sample processed                           | D          |                                                                                                                                                                                                                                    |
| Microdissection or macrodissection                        | E          | Microdissection                                                                                                                                                                                                                    |
| Processing procedure                                      | E          | Zebrafish tissues were collected and immediately frozen in liquid nitrogen                                                                                                                                                         |
| If frozen - how and how quickly?                          | E          | Immediate                                                                                                                                                                                                                          |
| If fixed - with what, how quickly?                        | E          | No                                                                                                                                                                                                                                 |
| Sample storage conditions and duration                    | E          | -80°C                                                                                                                                                                                                                              |
| <b>NUCLEIC ACID EXTRACTION</b>                            |            |                                                                                                                                                                                                                                    |
| Procedure and/or instrumentation                          | E          | Total RNA was extracted using the QIAGEN RNeasy mini kit following the manufacturer's protocol. Tissue was homogenized in Qiazol.                                                                                                  |
| Name of kit and details of any modifications              | E          | QIAGEN RNeasy mini kit per manufacturer's protocol                                                                                                                                                                                 |
| Source of additional reagents used                        | D          |                                                                                                                                                                                                                                    |
| Details of DNase or RNase treatment                       | E          | N/A. RNeasy silicamembrane technology efficiently removes most of the DNA without DNase treatment. All plastic and reagents used are certified RNase free.                                                                         |
| Contamination assessment (DNA or RNA)                     | E          | No reverse transcription reaction controls were run with qPCR probes                                                                                                                                                               |
| Nucleic acid quantification                               | E          | RNA quantity was measured on Nanodrop-1000                                                                                                                                                                                         |
| Instrument and method                                     | E          | RNA quantity was measured on Nanodrop-1000 following manufacturer's protocol                                                                                                                                                       |
| Purity (A260/A280)                                        | D          | See Supplemental Table 1                                                                                                                                                                                                           |
| Yield                                                     | D          |                                                                                                                                                                                                                                    |
| RNA integrity method/instrument                           | E          | Agilent Bioanalyzer                                                                                                                                                                                                                |
| RIN/RQI or Cq of 3' and 5' transcripts                    | E          | See Supplemental Table 1                                                                                                                                                                                                           |
| Electrophoresis traces                                    | D          |                                                                                                                                                                                                                                    |
| Inhibition testing (Cq dilutions, spike or other)         | E          | Not performed. Amplification product for housekeeping gene assay sufficient to rule out the presence of inhibitors of PCR and reverse-transcriptase inhibitors.                                                                    |
| <b>REVERSE TRANSCRIPTION</b>                              |            |                                                                                                                                                                                                                                    |
| Complete reaction conditions                              | E          | Reverse Transcription reaction carried out with the High Capacity cDNA Reverse Transcription Kit following manufacturer's protocol                                                                                                 |
| Amount of RNA and reaction volume                         | E          | Amount of RNA: 500 ng; Reaction volume: 20 µl                                                                                                                                                                                      |
| Priming oligonucleotide (if using GSP) and concentration  | E          | N/A                                                                                                                                                                                                                                |
| Reverse transcriptase and concentration                   | E          | High Capacity cDNA Reverse Transcription Kit components                                                                                                                                                                            |
| Temperature and time                                      | E          | Manufacturer's protocol                                                                                                                                                                                                            |
| Manufacturer of reagents and catalogue numbers            | D          |                                                                                                                                                                                                                                    |
| Cqs with and without RT                                   | D*         |                                                                                                                                                                                                                                    |
| Storage conditions of cDNA                                | D          |                                                                                                                                                                                                                                    |
| <b>qPCR TARGET INFORMATION</b>                            |            |                                                                                                                                                                                                                                    |
| If multiplex, efficiency and LOD of each assay.           | E          | N/A                                                                                                                                                                                                                                |
| Sequence accession number                                 | E          | See Supplemental Table 4                                                                                                                                                                                                           |
| Location of amplicon                                      | D          |                                                                                                                                                                                                                                    |
| Amplicon length                                           | E          | See Supplemental Table 4                                                                                                                                                                                                           |
| <i>In silico</i> specificity screen (BLAST, etc.)         | E          | All Taqman assays have been designed through Thermo Fisher's validated bioinformatics pipeline                                                                                                                                     |
| Pseudogenes, retropseudogenes or other homologs?          | D          |                                                                                                                                                                                                                                    |
| Sequence alignment                                        | D          |                                                                                                                                                                                                                                    |
| Secondary structure analysis of amplicon                  | D          |                                                                                                                                                                                                                                    |
| Location of each primer by exon or intron (if applicable) | E          | See Supplemental Table 4                                                                                                                                                                                                           |
| What splice variants are targeted?                        | E          | None (See Supplemental Table 4)                                                                                                                                                                                                    |
| <b>qPCR OLIGONUCLEOTIDES</b>                              |            |                                                                                                                                                                                                                                    |
| Primer sequences                                          | E          | Not available due to intellectual property of Thermo Fisher                                                                                                                                                                        |
| RTPrimerDB Identification Number                          | D          |                                                                                                                                                                                                                                    |
| Probe sequences                                           | D**        |                                                                                                                                                                                                                                    |
| Location and identity of any modifications                | E          | See Supplemental Table 4                                                                                                                                                                                                           |
| Manufacturer of oligonucleotides                          | D          |                                                                                                                                                                                                                                    |
| Purification method                                       | D          |                                                                                                                                                                                                                                    |
| <b>qPCR PROTOCOL</b>                                      |            |                                                                                                                                                                                                                                    |
| Complete reaction conditions                              | E          | See materials and methods                                                                                                                                                                                                          |
| Reaction volume and amount of cDNA/DNA                    | E          | Reaction volume: 20 µl; cDNA amount: 2 µl                                                                                                                                                                                          |
| Primer, (probe), Mg <sup>++</sup> and dNTP concentrations | E          | Primer concentration in 20x mix: 900nm; Probe concentration in 20x mix: 150 nm; Mg <sup>++</sup> and dNTP (in Taqman universal master mix no Amperase UNG) concentration unavailable due to intellectual property of Thermo Fisher |
| Polymerase identity and concentration                     | E          | Amplitaq Gold DNA polymerase. Concentration unavailable                                                                                                                                                                            |
| Buffer/kit identity and manufacturer                      | E          | Taqman universal master mix no Amperase UNG by Thermo Fisher                                                                                                                                                                       |
| Exact chemical constitution of the buffer                 | D          |                                                                                                                                                                                                                                    |
| Additives (SYBR Green I, DMSO, etc.)                      | E          | None                                                                                                                                                                                                                               |
| Manufacturer of plates/tubes and catalog number           | D          |                                                                                                                                                                                                                                    |
| Complete thermocycling parameters                         | E          | 50°C for 2 minutes, 90°C for 10 minutes, 40 cycles of 95°C for 15 seconds and 60°C for 1 minute                                                                                                                                    |
| Reaction setup (manual/robotic)                           | D          | Robotic                                                                                                                                                                                                                            |
| Manufacturer of qPCR instrument                           | E          | Applied Biosystems 7900                                                                                                                                                                                                            |

| <b>qPCR VALIDATION</b>                                   |   |                                                                                                                                                                             |
|----------------------------------------------------------|---|-----------------------------------------------------------------------------------------------------------------------------------------------------------------------------|
| Evidence of optimization (from gradients)                | D |                                                                                                                                                                             |
| Specificity (gel, sequence, melt, or digest)             | E |                                                                                                                                                                             |
| For SYBR Green I, Cq of the NTC                          | E |                                                                                                                                                                             |
| Standard curves with slope and y-intercept               | E |                                                                                                                                                                             |
| PCR efficiency calculated from slope                     | E |                                                                                                                                                                             |
| Confidence interval for PCR efficiency or standard error | D |                                                                                                                                                                             |
| r2 of standard curve                                     | E |                                                                                                                                                                             |
| Linear dynamic range                                     | E |                                                                                                                                                                             |
| Cq variation at lower limit                              | E |                                                                                                                                                                             |
| Confidence intervals throughout range                    | D |                                                                                                                                                                             |
| Evidence for limit of detection                          | E |                                                                                                                                                                             |
| If multiplex, efficiency and LOD of each assay.          | E | All primers and probes were supplied by Thermo Fisher Scientific. Taqman probes have been prevalidated. <sup>(17)</sup>                                                     |
| <b>DATA ANALYSIS</b>                                     |   |                                                                                                                                                                             |
| qPCR analysis program (source, version)                  | E | Sequence Detection System 2.4                                                                                                                                               |
| Cq method determination                                  | E | Cycle Threshold                                                                                                                                                             |
| Outlier identification and disposition                   | E | Runs were performed in triplicate and variations were shown to be minimal                                                                                                   |
| Results of NTCs                                          | E | NTCs were shown to have undetermined Cts                                                                                                                                    |
| Justification of number and choice of reference genes    | E | Actb was chosen as the reference gene. Actb was unchanged on the microarray. As we have previously used actb as a housekeeping gene, it was chosen to maintain consistency. |
| Description of normalization method                      | E | Data normalization was carried out via the $\Delta\Delta C_t$ method using actb as a housekeeping gene.                                                                     |
| Number and concordance of biological replicates          | D |                                                                                                                                                                             |
| Number and stage (RT or qPCR) of technical replicates    | E | qPCR reactions were done in triplicate                                                                                                                                      |
| Repeatability (intra-assay variation)                    | E | Intra-experiment variation was assessed by triplicates                                                                                                                      |
| Reproducibility (inter-assay variation, %CV)             | D |                                                                                                                                                                             |
| Power analysis                                           | D |                                                                                                                                                                             |
| Statistical methods for result significance              | E | Student's T-Test                                                                                                                                                            |
| Software (source, version)                               | E | Microsoft Excel 2013                                                                                                                                                        |
| Cq or raw data submission using RDML                     | D |                                                                                                                                                                             |
