# Supplementary material
Source: PubMed Central journal article supplement (PMC5035372)
Supplement: Supp_Table4.pdf [file Supp_Table4.pdf]

Supplemental Table 4. Target information for qPCR reactions.

| GENE SYMBOL             | SEQUENCE ACCESSION NUMBER | AMPLICON LENGTH | LOCATION | MODIFIERS                    | SPANS EXON JUNCTION |
|-------------------------|---------------------------|-----------------|----------|------------------------------|---------------------|
| <b>abcc2</b>            | NM_200589                 | 66              | 4-5      | FAM labeled Taqman MGB probe | yes                 |
| <b>actb</b>             | NM_131031                 | 62              | 1-2      | FAM labeled Taqman MGB probe | yes                 |
| <b>apobb</b>            | NM_001030062              | 70              | 11-12    | FAM labeled Taqman MGB probe | yes                 |
| <b>asb16</b>            | NM_001040368              | 137             | 3-3      | FAM labeled Taqman MGB probe | no                  |
| <b>ca2</b>              | NM_199215                 | 88              | 4-5      | FAM labeled Taqman MGB probe | yes                 |
| <b>cox6b1</b>           | NM_001002695              | 115             | 3-4      | FAM labeled Taqman MGB probe | yes                 |
| <b>cyp1a</b>            | NM_131879                 | 93              | 3-4      | FAM labeled Taqman MGB probe | yes                 |
| <b>cyp2k22</b>          | NM_200235                 | 74              | 4-5      | FAM labeled Taqman MGB probe | yes                 |
| <b>egr1</b>             | NM_131248                 | 119             | 1-2      | FAM labeled Taqman MGB probe | yes                 |
| <b>hsp70</b>            | NM_131397                 | 157             | 1-1      | FAM labeled Taqman MGB probe | no                  |
| <b>id2a</b>             | NM_201291                 | 127             | 1-2      | FAM labeled Taqman MGB probe | yes                 |
| <b>igf2b</b>            | NM_001001815              | 98              | 1-2      | FAM labeled Taqman MGB probe | yes                 |
| <b>lyz</b>              | NM_139180                 | 80              | 3-4      | FAM labeled Taqman MGB probe | yes                 |
| <b>mtp</b>              | NM_212970                 | 87              | N/A      | FAM labeled Taqman MGB probe | yes                 |
| <b>nr5a1b</b>           | NM_212834                 | 74              | 4-5      | FAM labeled Taqman MGB probe | yes                 |
| <b>nudt15</b>           | NM_001002107              | 91              | 2-3      | FAM labeled Taqman MGB probe | yes                 |
| <b>si:dkey-208k22.3</b> | NM_001114577              | 85              | 1-2      | FAM labeled Taqman MGB probe | yes                 |
| <b>sox9a</b>            | NM_131643                 | 99              | 2-3      | FAM labeled Taqman MGB probe | yes                 |
| <b>sox9b</b>            | NM_131644                 | 89              | 2-3      | FAM labeled Taqman MGB probe | yes                 |
| <b>star</b>             | NM_131663                 | 95              | 6-7      | FAM labeled Taqman MGB probe | yes                 |
| <b>ucp1</b>             | NM_199523                 | 66              | 2-3      | FAM labeled Taqman MGB probe | yes                 |
| <b>ugt5g1</b>           | NM_001114442              | 109             | 3-4      | FAM labeled Taqman MGB probe | yes                 |
| <b>vasa</b>             | NM_131057                 | 78              | 9-10     | FAM labeled Taqman MGB probe | yes                 |
| <b>vtg7</b>             | NM_001102671              | 75              | 9-10     | FAM labeled Taqman MGB probe | yes                 |
